# Supplementary material for: Organic–inorganic hybrid photocatalyst consisting of a highly conjugated metal complex and graphitic carbon nitride for efficient hydrogen evolution and Cr(vi) reduction
Source: Royal Society of Chemistry journal article supplement (doi:10.1039/d2ta05200h), 2022-01-01
Supplement: d2ta05200h1.pdf [file d2ta05200h1.pdf]

**Organic-inorganic hybrid photocatalyst consisting of highly conjugated metal complex and graphitic carbon nitride for efficient hydrogen evolution and Cr(VI) reduction.**

Bishal Das<sup>a#</sup>, Laxmi Prasad Rao Pala<sup>b#</sup>, Manoj Kumar Mohanta<sup>c</sup>, Meghali Devi<sup>a</sup>, Debarati Chakraborty<sup>a</sup>, Nageswara Rao Peela<sup>b</sup>, Mohammad Qureshi<sup>c</sup>, Siddhartha Sankar Dhar<sup>a\*</sup>,

<sup>a</sup> Department of Chemistry, National Institute of Technology, Silchar, Silchar, Cachar, 788010, Assam, India. E-mail: [ssd@che.nits.ac.in](mailto:ssd@che.nits.ac.in)

<sup>b</sup> Department of Chemical Engineering, Indian Institute of Technology, Guwahati

<sup>c</sup> Department of Chemistry, Indian Institute of Technology, Guwahati

# Equal contribution

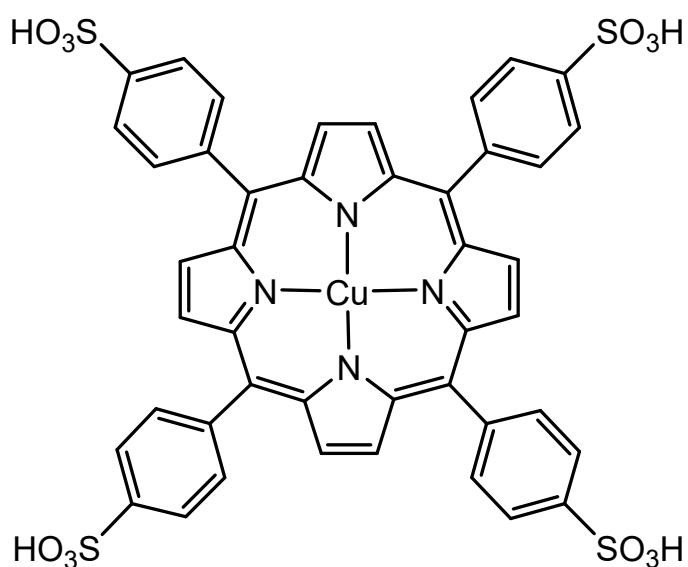

Figure S1. Schematic structure of Cu-Por

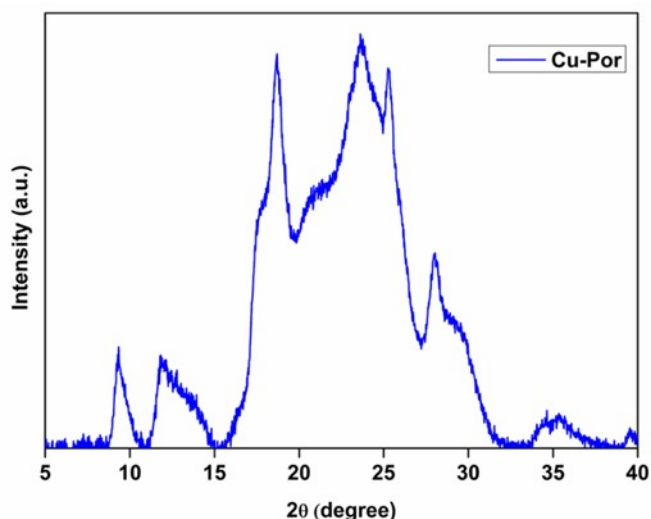

Figure S2. XRD of Cu-Por

The XRD data of Cu-Por shows peaks at  $9.3^\circ$ ,  $11.8^\circ$ ,  $18.7^\circ$ ,  $23.5^\circ$ ,  $25.1^\circ$  and  $28.1^\circ$  which are consistent with the literature.<sup>S1,S2</sup>

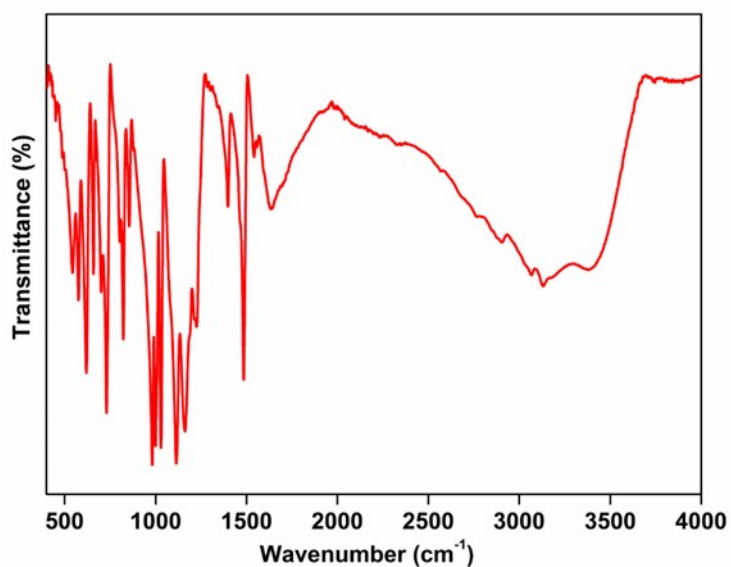

Figure S3. FT-IR spectra of Cu-Por

The peaks at  $570$  and  $1020\text{ cm}^{-1}$  are assigned to S-O and O=S=O bonds respectively. The peaks at  $729$ ,  $1502$ ,  $1636\text{ cm}^{-1}$  can be allocated to the benzene ring. The peaks at  $550$ ,  $850$ ,  $1064$ ,  $1120$  and  $1410\text{ cm}^{-1}$  due to in-plane modes of pyrrole rings. The peak at  $1166\text{ cm}^{-1}$  is due to N-Cu vibration. The peaks at  $1542$  and  $1643\text{ cm}^{-1}$  are assigned to C=N vibrations. Other peaks in the range of  $500\text{-}800\text{ cm}^{-1}$  are due to bending vibrations of C-H and C-C. The peak in the range of  $3000\text{-}3600\text{ cm}^{-1}$  are due to =C-H stretching and absorbed water molecules.<sup>S3,S4</sup>

| Wavenumber ( $\text{cm}^{-1}$ ) | Vibration type |
|---------------------------------|----------------|
| 570                             | S-O            |
| 1020                            | O=S=O          |

|           |                             |
|-----------|-----------------------------|
| 729       | Vibrations of phenyl ring   |
| 1508      |                             |
| 1602      |                             |
| 550       | Vibrations of pyrrole ring  |
| 850       |                             |
| 1064      |                             |
| 1120      |                             |
| 1410      |                             |
| 1166      | N-Cu                        |
| 1643      | C=N                         |
| 1542      |                             |
| 3000-3600 | C-H str. and absorbed water |

Table S1. FT-IR spectra of Cu-Por

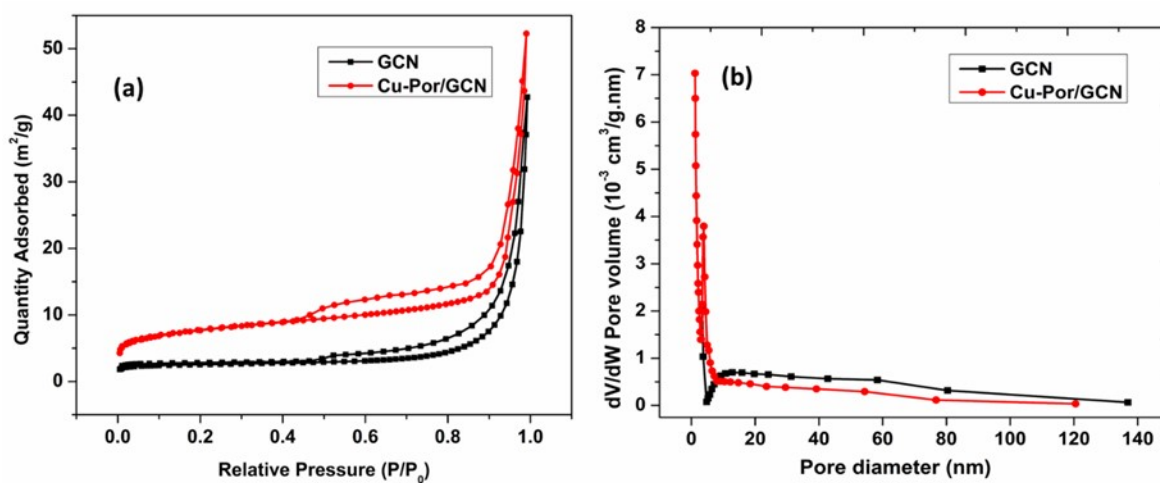

Figure S4. (a) Nitrogen adsorption-desorption isotherms and (b) BJH pore size distribution of GCN and Cu-Por/GCN

| Photocatalyst | Surface area (m <sup>2</sup> /g) | Mean pore diameter (nm) | Pore volume (cm <sup>3</sup> /g) |
|---------------|----------------------------------|-------------------------|----------------------------------|
| GCN           | 8.00                             | 6.12                    | 0.06                             |
| Cu-Por/GCN    | 35.25                            | 23.43                   | 0.17                             |

Table S2. (a) Surface area (B) Mean pore diameter and (c) pore volume of GCN and Cu-Por/GCN

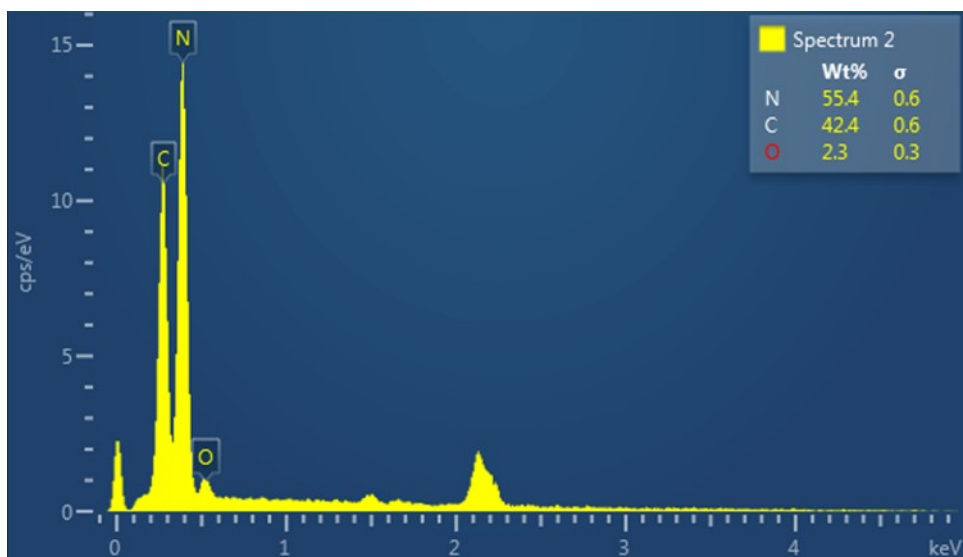

Figure S5. EDS spectrum of GCN.

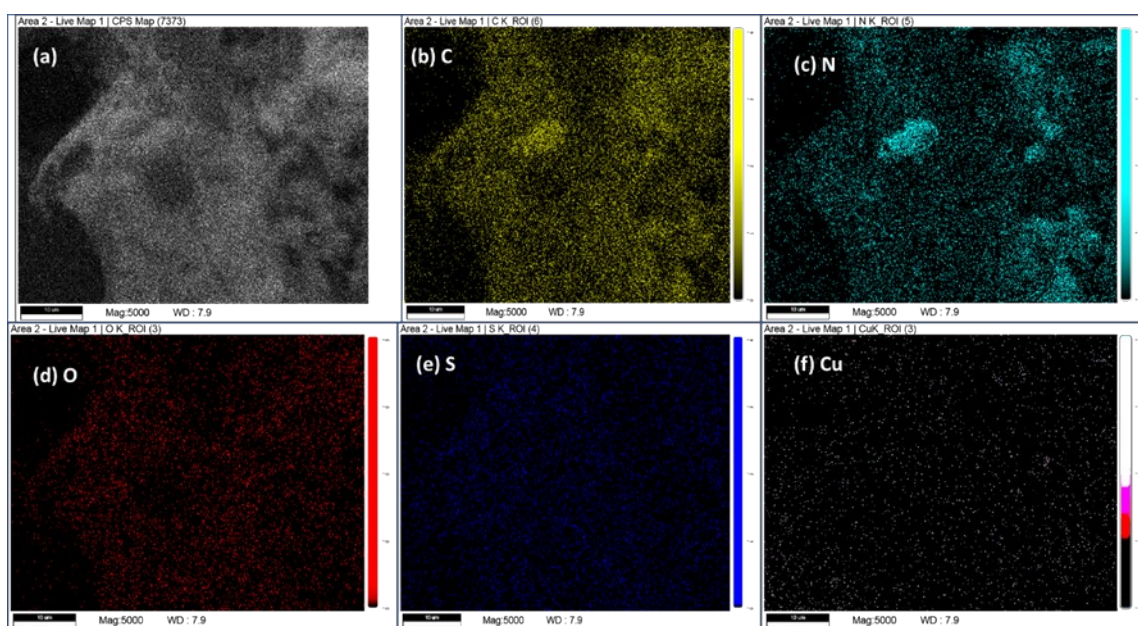

Figure S6. EDS Mapping of Cu-Por/GCN

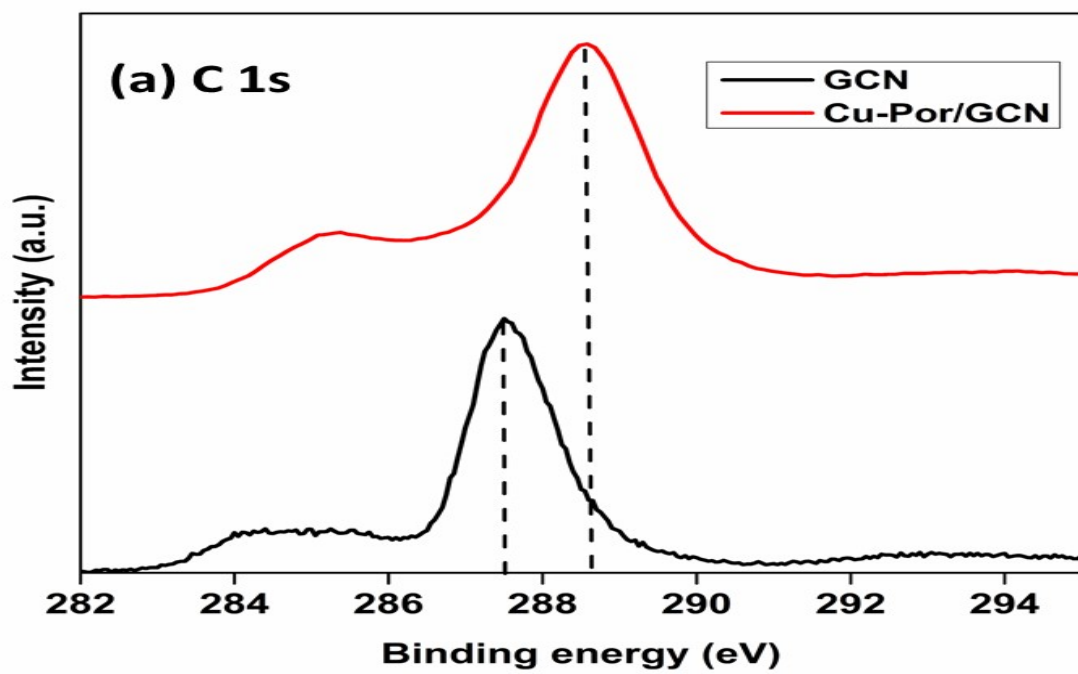

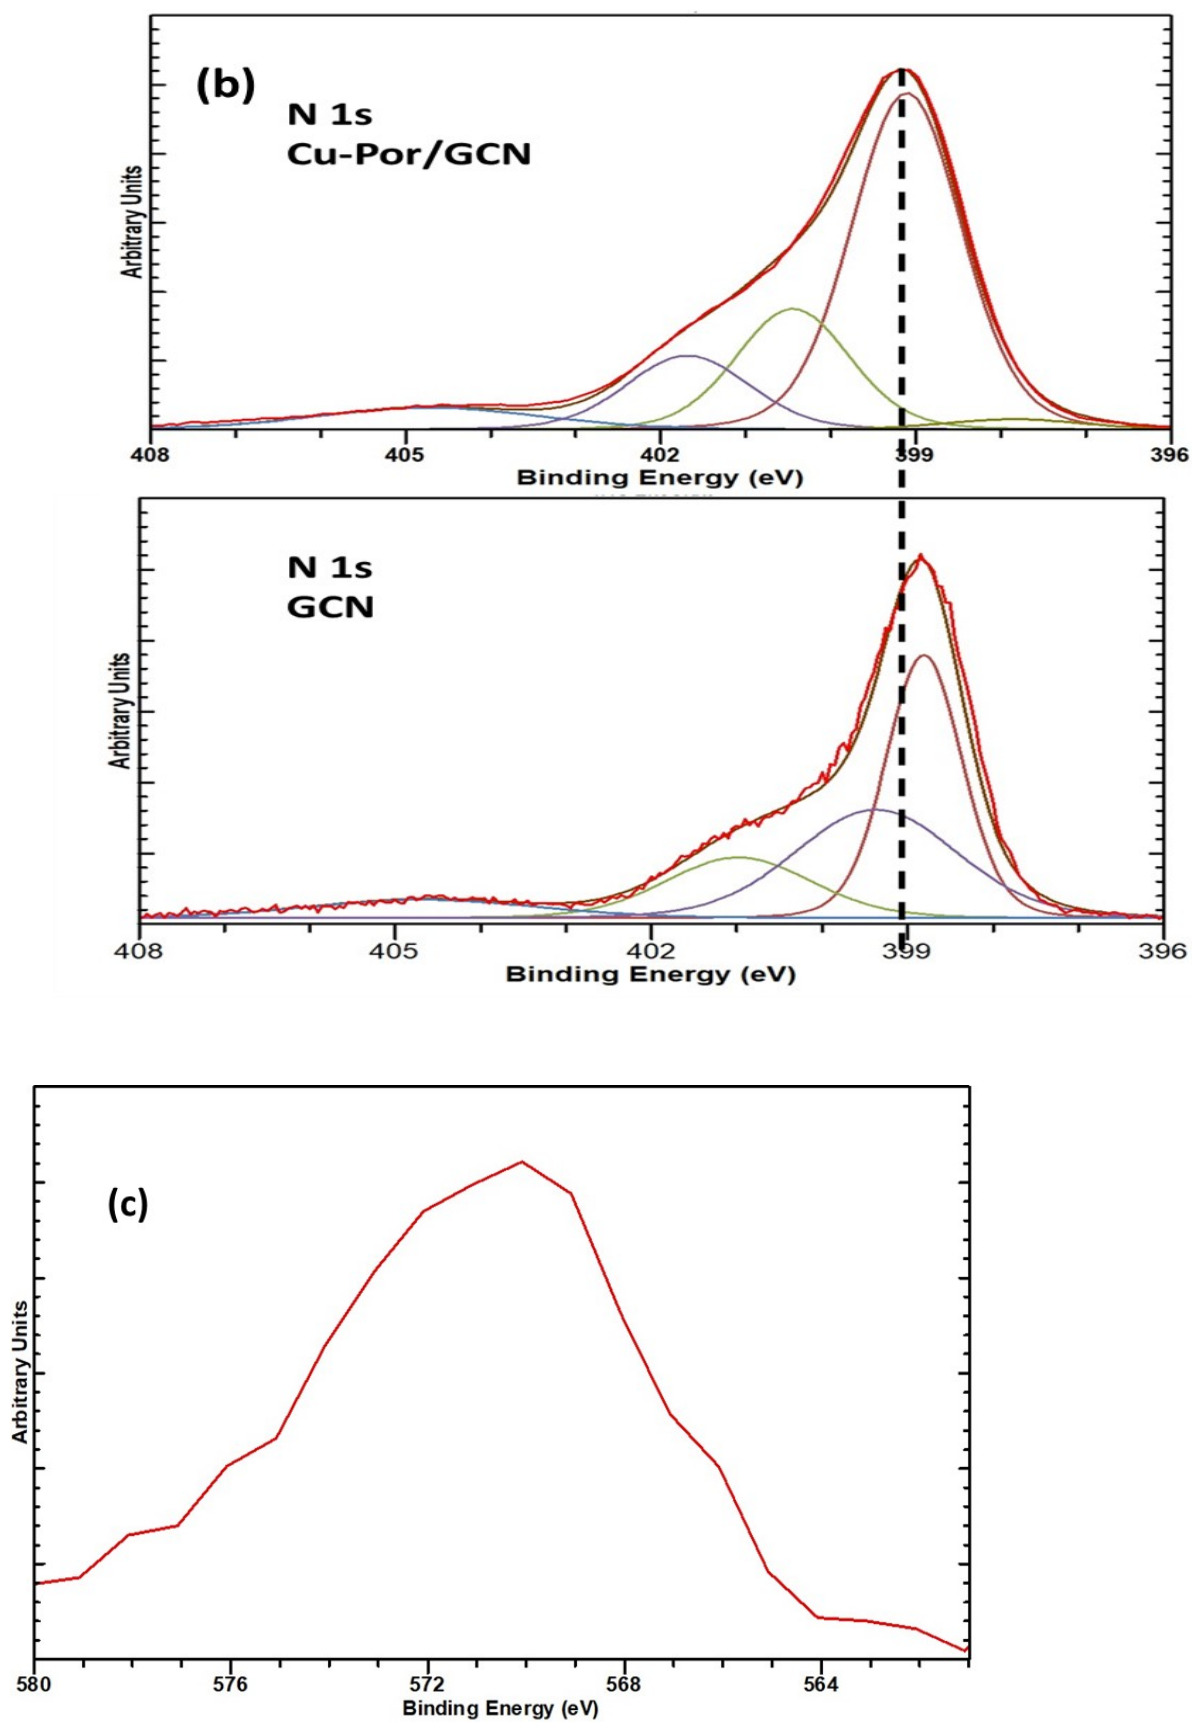

Figure S7. Shift of peak in Cu-Por/GCN in comparison with GCN in (a) C 1s and (b) N 1s (c) Cu LMM peak

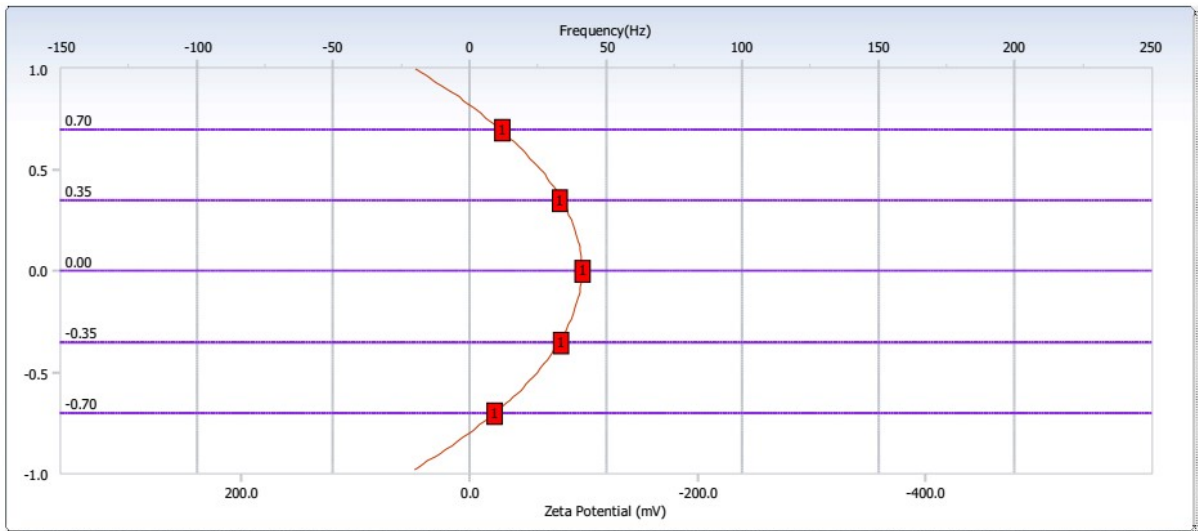

Figure S8. Zeta potential of GCN

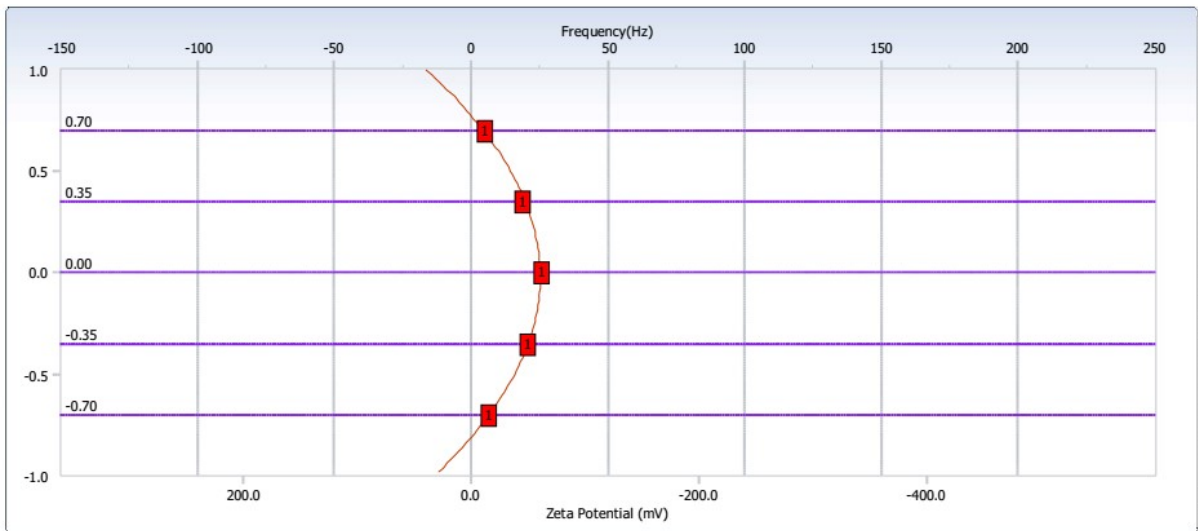

Figure S9. Zeta potential of Cu-Por/GCN

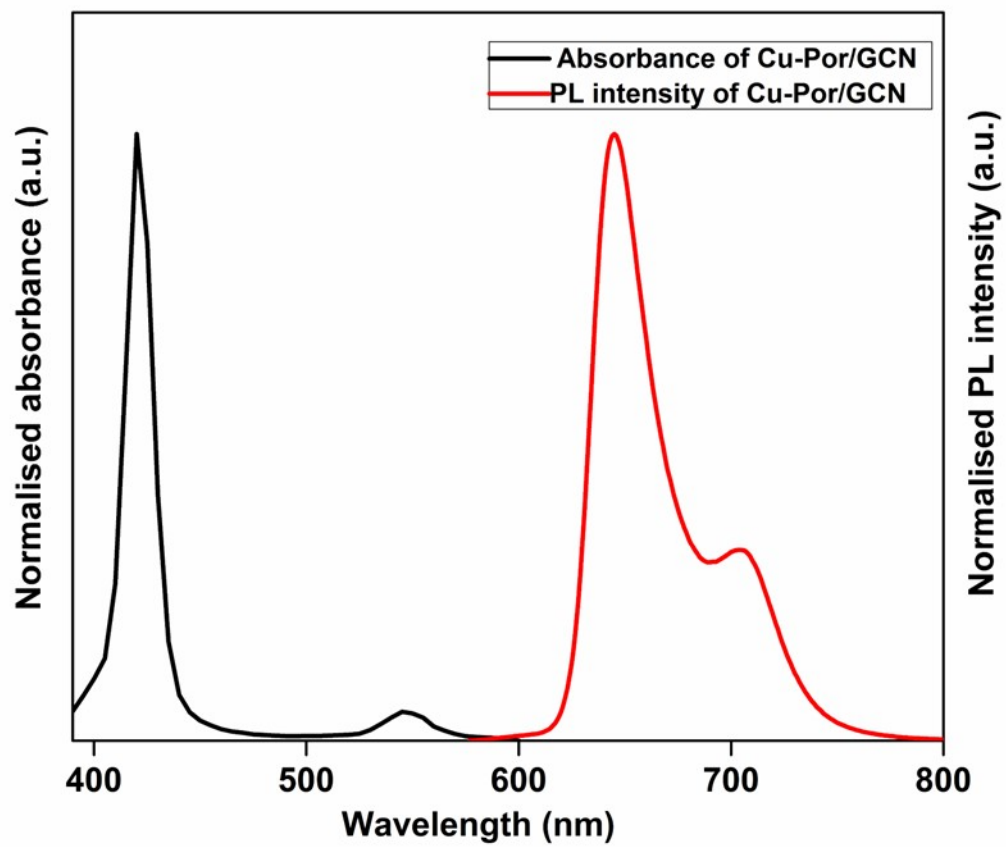

Figure S10. Comparison of absorbance and PL of Cu-Por/GCN



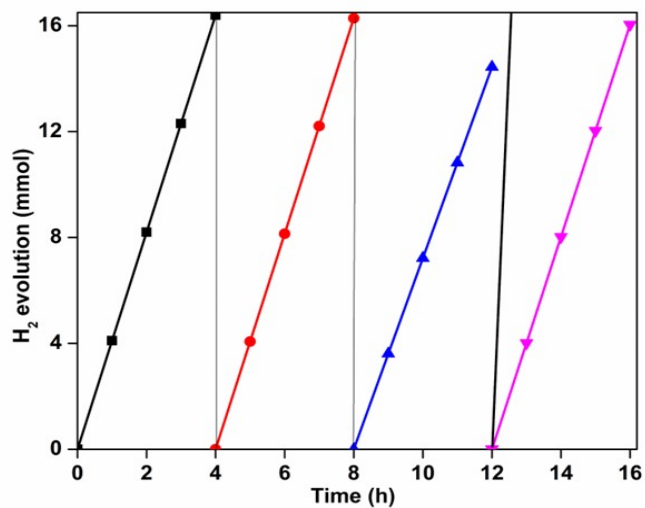

Figure S11. (c) Recyclability of Cu-Por/GCN

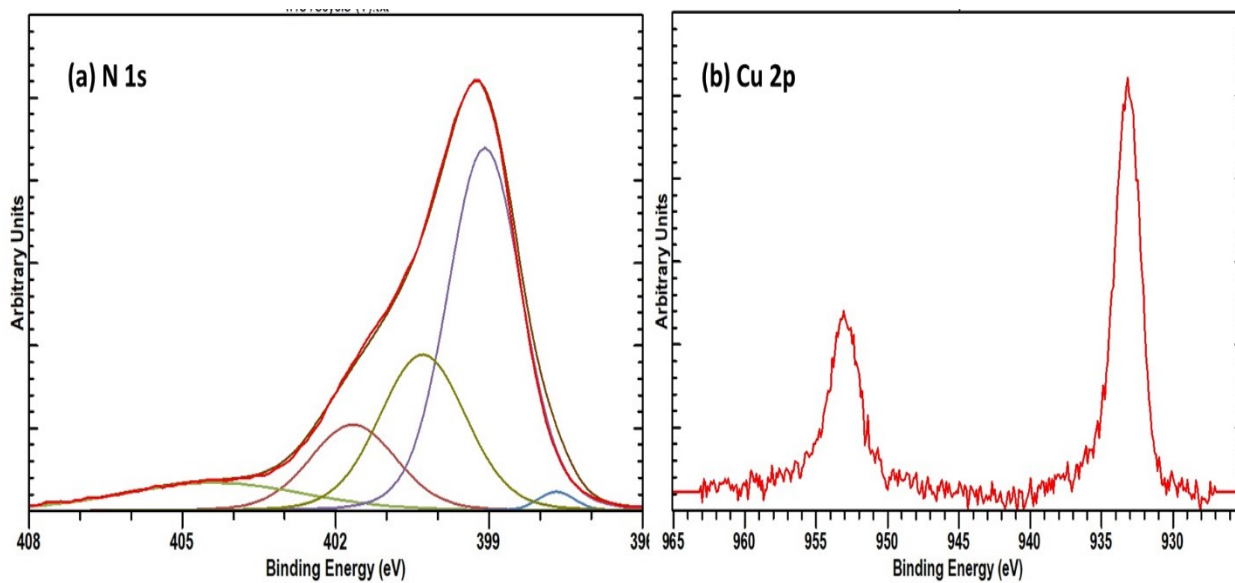

Figure S12. (a) N 1s and (b) Cu 2p XPS spectra of reused Cu-Por/GCN

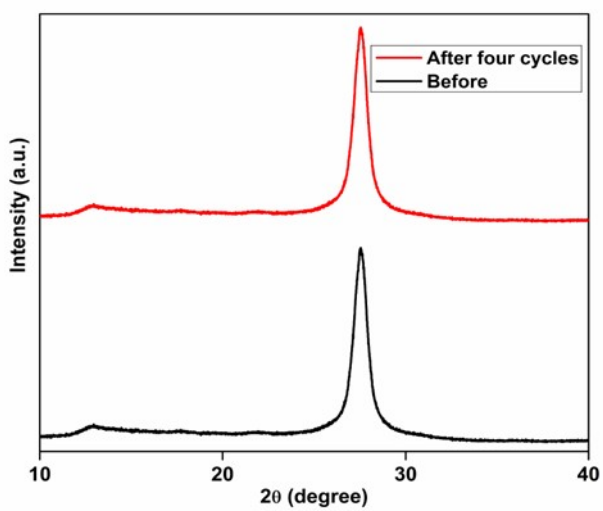

Figure S13. Comparison of XRD of Cu-Por/GCN before and after four cycles.

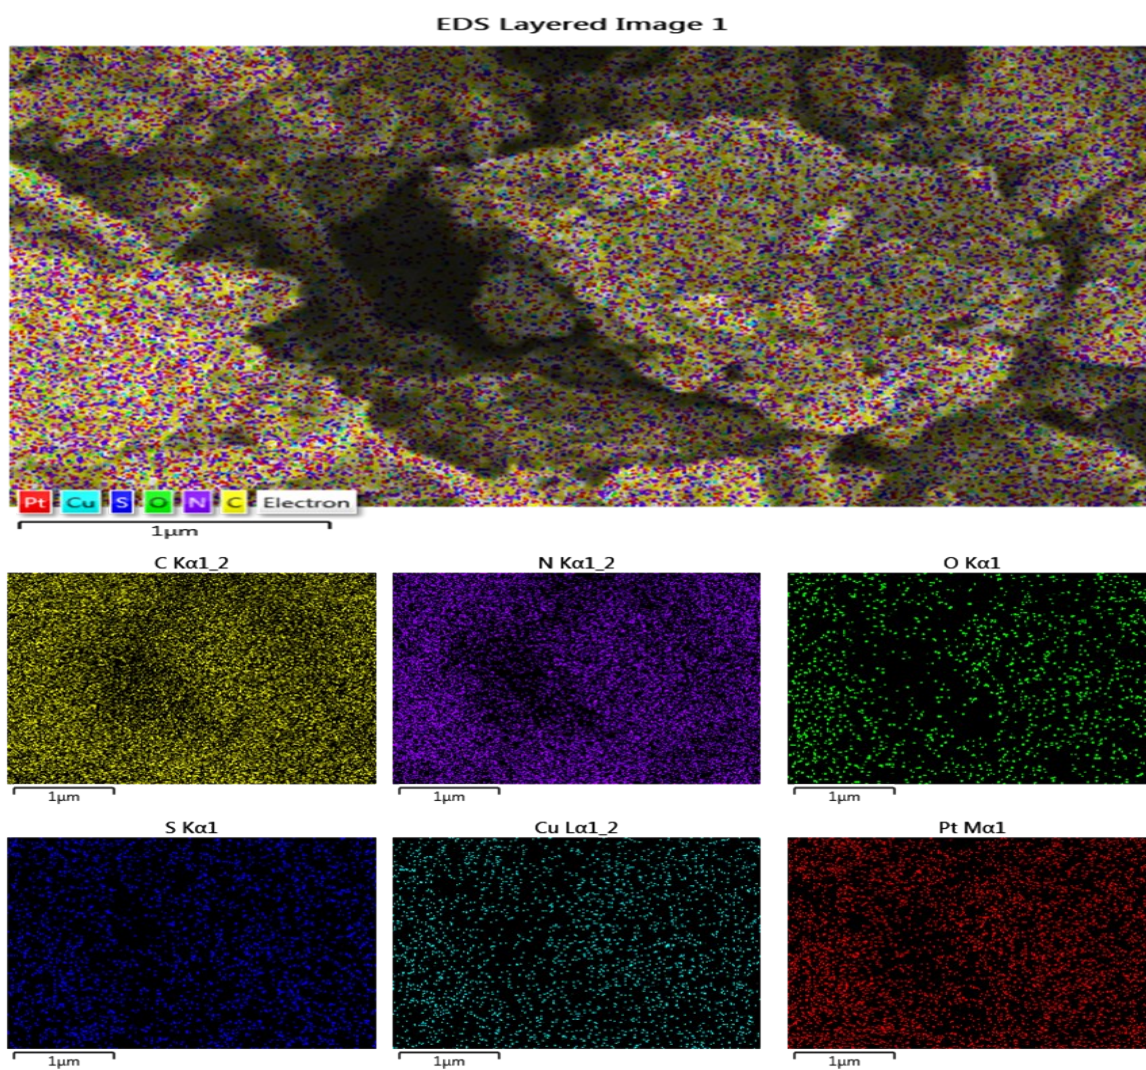

Fig. S14: SEM/EDS and mapping of Cu-Por/GCN after photocatalysis.

| Ref. No. | Catalyst                                                         | Cu content (%) | H <sub>2</sub> evolution (μmol g <sup>-1</sup> h <sup>-1</sup> ) | AQY (%) |
|----------|------------------------------------------------------------------|----------------|------------------------------------------------------------------|---------|
| S5.      | Cu-Cu <sub>2</sub> O/GCN                                         | 7              | 400                                                              | NA      |
| S6.      | Cu <sub>2</sub> O@GCN                                            | 83.2           | 795                                                              | NA      |
| S7.      | Cu <sub>2</sub> O-GCN                                            | 0.93           | 842                                                              | NA      |
| S8.      | Cu <sub>3</sub> P/g-C3N                                          | 1              | 343                                                              | NA      |
| S9.      | Cu <sub>2</sub> (OH) <sub>2</sub> CO <sub>3</sub>                | 3              | 22.6                                                             | NA      |
| S10.     | Cu/GCN                                                           | 45             | 3774.35                                                          | 1.34    |
| S11.     | CuS/GCN                                                          | 2              | 348                                                              | NA      |
| S12.     | Cu <sub>3</sub> P/GCN                                            | 1              | 284                                                              | 2.6     |
| S13.     | CuNiS/GCN                                                        | 2              | 758.2                                                            | 4.38    |
|          | Copper tetraphenylporphyrin tetrasulphonic acid/ GCN (This work) | 0.6            | 4100                                                             | 65.1    |

Table S3: Comparison of photocatalytic H<sub>2</sub> evolution various copper containing GCN based catalysts.

## References

- S1. L. Yanfei, M. He, R. Guo, Z. Fang, K. Shifei, Z. Ma, M. Dong, W. Wenlong and C. Lifeng. *Appl. Catal., B*, 2020, 260, 118137.
- S2. K. Zhu, M. Zhang, X. Feng, L. Qin, S. Z. Kang and X. Li, *Appl. Catal., B*, 2020, 268, 118434.
- S3. H. Zhang, R. Zhang, X. Liu, F. Ding, C. Shi, Z. Zhou and N. Zhao, *J. Mater. Chem. A*, 2021, 9, 24915–24921.
- S4. I. Elsayed, M. Mashaly, F. Eltaweel, M. A. Jackson and E. B. Hassan, *Fuel*, 2018, 221, 407–416.
- S5. P. Zhang, T. Wang and H. Zeng, *Appl. Surf. Sci.*, 2017, **391**, 404-414.
- S6. L. Liu, Y. Qi, J. Hu, Y. Liang and W. Cui, *Appl. Surf. Sci.*, 2015, **351**, 1146-1154.
- S7. S. Anandan, J. J. Wu, D. Bahnemann, A. Emelin and M. Ashokkumar, 2017, **527**, 34-41.
- S8. H. Zhou, R. Chen, C. Han, P. Wang, Z. Tong, B. Tan, Y. Huang and Z. Liu, *J. Colloid Interf. Sci.*, 2022, 610, 126-135
- S9. Y. Liu, X. Wu, H. Lv, Y. Cao and H. Ren, *Dalton Trans.*, 2019, **48**, 1217-1225
- S10. C. Wang, J. Xie, Ning Chen, Weifeng Chen, Penghui Bai and Hu Wang, *ACS Appl. Energy Mater*, 2021, **4**, 13796–13802.
- S11. R. Shen, J. Xie, P. Guo, L.O Chen, X. Chen and X. Li, *ACS Appl. Energy Mater.*, 2018, **1**, 2232-2241.
- S12. Z. Qin, M. Wang, R. Li and Y. Chen, *Sci. China Mater.*, 2018, **61**, 861-868
- S13. W. Wang, Y. Tao, L. Du, Z. Wei, Z. Yan, W.K. Chan, Z. Lian, R. Zhu, D.L. Phillips and G. Li, *Appl. Catal., B*, 2021, **282**, 119568
